# Supplementary material
Source: PubMed Central journal article supplement (PMC5831255)
Supplement: NIHMS898074-supplement-1.pdf [file NIHMS898074-supplement-1.pdf]

## Supplementary Figure 1

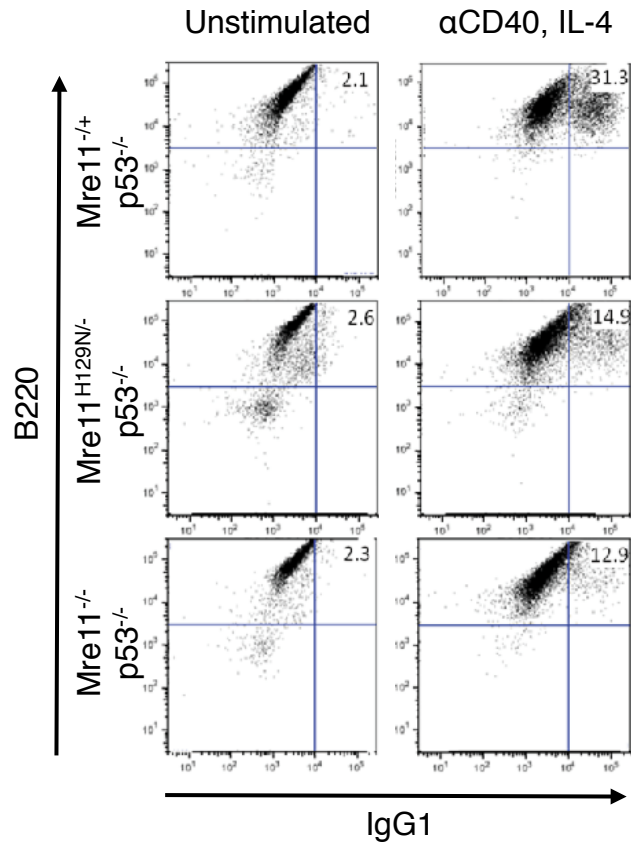

**Supplementary Figure 1: Class switching in Mre11/p53 mutant B cells.** Primary splenic B cells of the indicated genotypes were cultured then stimulated with  $\alpha$ -CD40/IL-4 to induce class switching. CSR to IgG1 was analyzed by flow cytometry with  $\alpha$ -B220 and  $\alpha$ -IgG1 antibodies. Representative plots are shown.

## Supplementary Figure 2

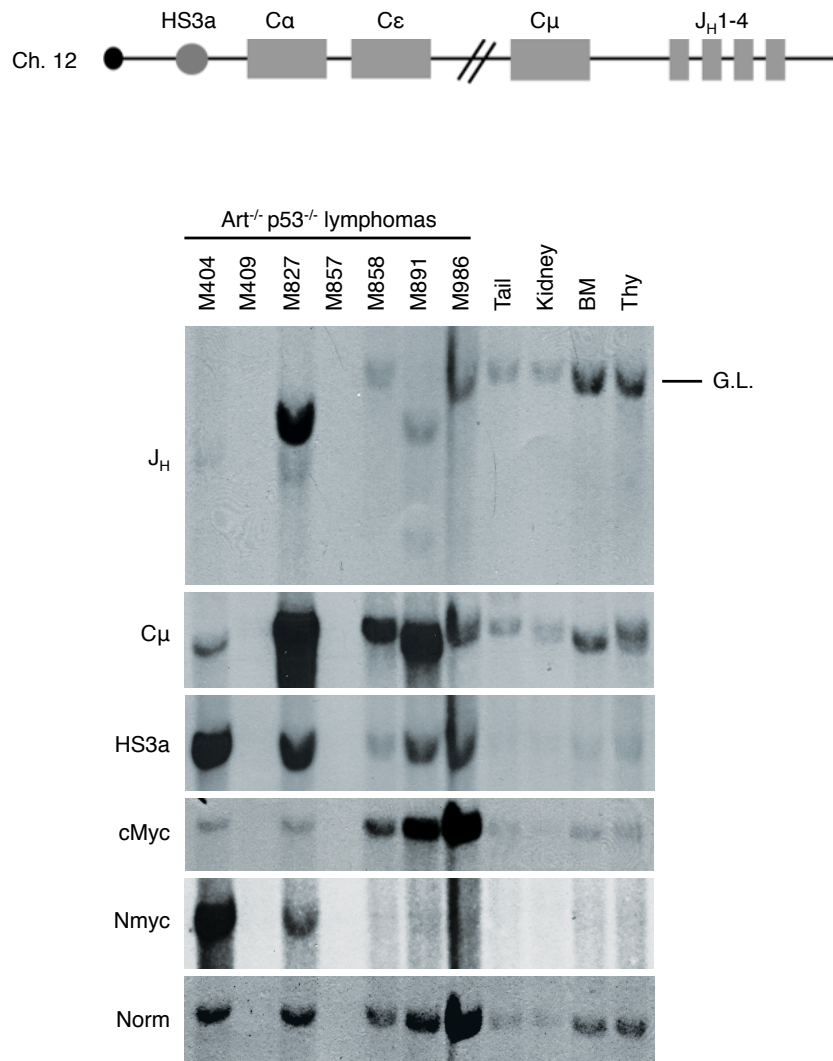

**Supplementary Figure 2. Southern blot analysis of IgH locus, *c-Myc* and *N-myc* in *Artemis*<sup>-/-</sup> *p53*<sup>-/-</sup> lymphomas.** Genomic DNA (gDNA) was isolated from primary lymph node tumors, digested with *Eco*RI and analyzed by Southern blotting. The membranes were hybridized with probes located within the IgH locus (diagrammed, top panel), *c-Myc* and *N-myc*, as described. Amplification of the IgH locus involving the J<sub>H</sub> cluster, C<sub>μ</sub>, and/or enhancer HS3a and *c-Myc* or *N-myc* was observed in the pro-B lymphomas analyzed. Data are representative of 7 *Artemis*<sup>-/-</sup> *p53*<sup>-/-</sup> pro-B tumors analyzed in this study.

## Supplementary Figure 3

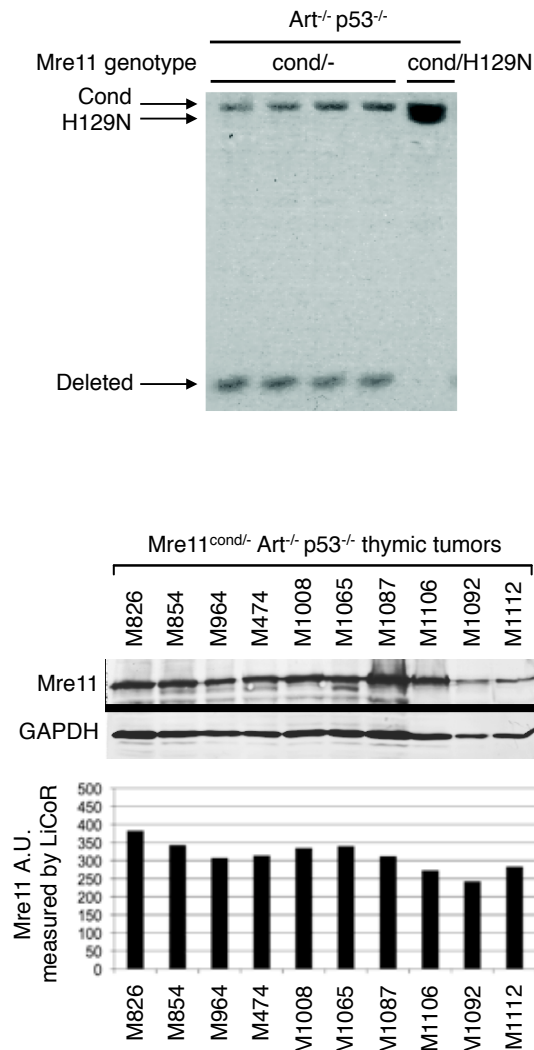

**Supplementary Figure 3. *Mre11* conditional allele is retained in thymic tumors from *Art<sup>-/-</sup> p53<sup>-/-</sup>* mice with B-cell specific *Mre11* mutations. (A)** Representative PCR genotyping of the *Mre11* alleles of primary thymic tumors arising in *Art<sup>-/-</sup> p53<sup>-/-</sup> Cre+Mre11<sup>cond/-</sup>* and *Art<sup>-/-</sup> p53<sup>-/-</sup> Cre+Mre11<sup>cond/H129N</sup>* mice; Cond, band corresponding to undeleted conditional allele, Deleted, “-“ allele. The Cond and H129N allele are separated by 50bp and appear as a doublet. **(B)** Protein lysates of primary tumors were isolated and analyzed by western blotting with an  $\alpha$ -MRE11 antibody. Lower panel: Quantitation of MRE11 protein levels; Arbitrary units (A.U.) measured by LI-COR software.

# Supplementary Figure 4

A

| IgH sequence                                                                                                                                                                                                                                                                                                                                                                                                                                                                                                                                                                                                                                                                                                                                                                                                                                                                                                                                                                                                                                                                                                                                                                                                                                                                                                                                                                                                                                                                                                                                                                                                                | Junction                                      | Myc sequence                                                                                                                                                                                                                                                                                                                                                                                                                                                                                                                                                                                                                                                                                                                                                                                                                                                                                                                                                                                                                                                                                                                                                                                                                                                                                                |
|-----------------------------------------------------------------------------------------------------------------------------------------------------------------------------------------------------------------------------------------------------------------------------------------------------------------------------------------------------------------------------------------------------------------------------------------------------------------------------------------------------------------------------------------------------------------------------------------------------------------------------------------------------------------------------------------------------------------------------------------------------------------------------------------------------------------------------------------------------------------------------------------------------------------------------------------------------------------------------------------------------------------------------------------------------------------------------------------------------------------------------------------------------------------------------------------------------------------------------------------------------------------------------------------------------------------------------------------------------------------------------------------------------------------------------------------------------------------------------------------------------------------------------------------------------------------------------------------------------------------------------|-----------------------------------------------|-------------------------------------------------------------------------------------------------------------------------------------------------------------------------------------------------------------------------------------------------------------------------------------------------------------------------------------------------------------------------------------------------------------------------------------------------------------------------------------------------------------------------------------------------------------------------------------------------------------------------------------------------------------------------------------------------------------------------------------------------------------------------------------------------------------------------------------------------------------------------------------------------------------------------------------------------------------------------------------------------------------------------------------------------------------------------------------------------------------------------------------------------------------------------------------------------------------------------------------------------------------------------------------------------------------|
| Mre11 <sup>+/+</sup>                                                                                                                                                                                                                                                                                                                                                                                                                                                                                                                                                                                                                                                                                                                                                                                                                                                                                                                                                                                                                                                                                                                                                                                                                                                                                                                                                                                                                                                                                                                                                                                                        |                                               |                                                                                                                                                                                                                                                                                                                                                                                                                                                                                                                                                                                                                                                                                                                                                                                                                                                                                                                                                                                                                                                                                                                                                                                                                                                                                                             |
| <p>1222 bp- ends in exon 3- of J<sub>4</sub></p> <p>CCTCAGTACCCTGCTCCTCAGGATAAGGAATGGCTCTCCAGGCTTTAT<br/>           TTTAAACCTTTGTTATGGAGTTTCTGTGCATTGCAGACTAATCTTGGATATT<br/>           TGTCCTGGAGGAGCCGGCTGAGAGAAGTTGGGAAATAAAGCTGCTAGGG<br/>           ATCTCAGAGCCCTTAGGACAGATTAICTCCACATCTTTGAAAACTAAGAAT<br/>           CTGTGTGATGGTGTGGTGGAGCTCCCTGATGATGGATAGGGACTTTGG<br/>           AGGCTCATTGAGGAGATGCTAAACAATCTCTAGGCTGGAGGATAGTT<br/>           GGGCTGTAGTGGAGTTTTCAGTTTAAAGATAAAGTATAGCTGGGA<br/>           ATATACTCAGSACCACCTTTGTGACAGCATTATACAGTATCCGATGCATA<br/>           NGACAAGAAGTGGAGTGGGCACTTTCTTANATTTGTGAGAAATGTTCC<br/>           AACTANATTTTAAACCTCATTGTGGTAGGAGAGCTGTCTACTGAT<br/>           TGAGTCAAGGAGAAAGGCATCTGCGCTCGGTCTCAAAGGGTAGTGGCT<br/>           GCTCAGAGGCTGGTGGAGCTGCAAAAGTCCAGCTTTCAAAGGAACA<br/>           CAGAAGTATGTATGAATATAGAAGATGTGCTTTAATCTTAAAGTGGT<br/>           TCCTAGGAAAAATGTTAAATCTGTACTTTAAATGTGAGAGGTTTTC<br/>           AGTACTCATTTTTAAATGCTCAAAATTTTGTCAATCAATTTGAGGCTGTG<br/>           TTTGTGTAGAACTGACATCTTAAAGTTTANCCGAGGAAATGGAGTGGG<br/>           CTCTCTCATGCCCTATTAGAACTGACTTTTAAACAATAAATAAAGTTTAA<br/>           AATTTTAAATGAATTTGAGCANTGTGAGTGGAGTCAAGATGGCCGATC<br/>           AGAACCAAGACCTTCAAGAGCTGGCAGGAAGCAGGTCTATGGCAAG<br/>           GCTATTTGGGAAAGGGAATAAANCCACTAGGTAACCTGTAGCTGTGGT<br/>           TTGAAAAGTGGTTTGAACCCCTGTCCAGCCGCCCAACNAAAGTCC<br/>           AGGCCGAAACAAACNCCCTGGGNNANTTGCATTNCTAAANANNTGNA<br/>           GAATCCCCNAACTNNGANANGGCCCNNTTAACTNTTGGAGTTCACC<br/>           TTTAATTTNACCTGAAAAANTCCANTNCCCAAACTTANGTT</p> | <p>Not detectable-translocation too large</p> | <p>986 bp, ends in exon 1</p> <p>TGTGGAGGTGTATGGGGTGTAGACCGGCAGAGACTCTCCCGGAGGAGC<br/>           CGGGTAGAGCGCACCCGCCCTTTACTTGGACTGCGCAGGGAGACCT<br/>           ACAGGGGAAAGAGCCGCTCCACACCACCCGCGGGTGGAAAGTCCGAAC<br/>           CGGAGGTGCTGGAGTGTGTGTGGGGGGGGGGGAAATCTGCCTTTTGG<br/>           CAGCAATTTGGGGGGGGGGTGTGTCTGCGAAAGAAATGTGCCAGTCAACA<br/>           TAACGTACGACCAAGGCAAAATACCAATGCTTCCCGCGAGATGGT<br/>           TGGCTGTTTATCCCTAAGTGGCTCTCAAGTATACGTGGAGTGAATGGT<br/>           GAGCAATTTAATAAAATCCAGACATCTTTTCTGCTCATAGACCTCATCTG<br/>           CGTTGATCACCTCTATCACTCCACACACTGAGCCGGGCTCTAGATAA<br/>           CTCAATCTGCTGCTTCCCTTCTAAATCTGTTTCCCGAGCTTATA<br/>           GAGACCGCTTCCCGCCGGGACGTGGTGAAGGCTCCGAGGATCATGG<br/>           CGTATTGTGTGAGCGGAGGAGCTTCCACCTCGGTGACTATATACGC<br/>           AGGCAAGAACAACATTTAGCCGAGCGTCCGCCCAACACCTCAG<br/>           AAAGGAAAGGACTAGCGCCGAGCAAGAAATGTGCGGCCGACAG<br/>           TTAATCATGCTGGCTTACTTGTTTACACCCCGGAGCCGAGTCTGGG<br/>           CTCCGGGGGCTGAAGCTCTCTCTCTTCCCGGCTCCCACTAGCC<br/>           CCTCCGAGTTTCCCAAGCAAAAGNNGGGGAAGGAGGAGGAGGAAAA<br/>           AAAAAATTANAGAGAGTGGGGAAGGANAANAANAAGATCTCTGGGCTAA<br/>           TCCCGCCCAACCCGCTTANNATTTCCGGGGTCTGCCGNCNCTAA<br/>           GGACCCNTGGGNTGCNCTGCTTCAACCTNCCCGGTCGCA</p> |
| <p>1202 bp- ends in exon 3' of J<sub>4</sub></p> <p>CCTCAGTGAAGAATGGCTCTCCAGGCTTTTATTTAACCTTTGTTATGGA<br/>           GTTTTCTGAGCATTGCAGACTAATCTTGGATATTGCTCCCTGAGGAGCCG<br/>           GCTGAGAGAAGTTGGGAAATAAAGTCTCAGGATCTCAGAGCCTTTAGGA<br/>           CAGATTATCCACATCTTTGAAAACATAAGAACTGTGCTGATGGTGTGGT<br/>           GGAGTCCCTGGATGATGGATAGGGACTTTGGAGGCTCATTGAGGGAAGA<br/>           TGCTAAAACAATCTCAGTGGCCGAGGGATAGTTGGGCTGTAGTTGGAGAT<br/>           TTTCAATTTTGAATAAAGTGTAGCTGGCAATATACTCAGGACCACT<br/>           TCTGTGACAGCATTATACAGTATCCGATGCATAGGGCAAAAGAGTGGAGT<br/>           GGGGCACTTTCTTAGATTGTGAGGAATGTTCCACACTAGATTGTTTAA<br/>           CTTCAATTTGTTGAAGGAGGCTGTCTAGTATTGAGTCAAGGAGGAAAG<br/>           GCATCTAGCCCTCGGCTCAAAGAGGATGCTGCTCAGAGAGGCTTGGT<br/>           GGAGCCTGCAAAAGTCCAGCTTTCAAAGGAACAGAAATGTATGATGG<br/>           AATATAGAAGATGTTGCTTTTACTCTTAAAGTGGTTCCTAGGAAGAATG<br/>           AAATACTGTGACTTAAATGTTGAGAGGGTTTTCAAGTACTCATTTTTAA<br/>           TGCCAAAATTTTGTCAATCAATTTGAGGCTCTGTTGTGTAGAACTGACA<br/>           TTAATTAAGTTTAAACCGAAGTGGAGTGGGCTCTCTCATACCTTATC<br/>           AGAACTGACTTTTAAACAATAAATAAATTAAGTTTGAATATTTTAAATGA<br/>           AGCAATGTTGAGTGTGAGTCAAGATGGCCGATCAGAACCAAGCAACCTG<br/>           CAGCAGCTGGCAGGAAGCAGGTGATGGCAAGGCTATTGGGGAAGGG<br/>           AAAAAAACCACTAGGTAACCTGTAGCTGTGGTTTGAAGAAGTGGTTT<br/>           AAACACTGTGTCAGCCCNCCCAAGGAAAGTCCAGGCTGAAACCAACNC<br/>           CACTGGGNNANTNGCATTTCTAAAAAANTTGAAGNATCCGCGNAACTGGA<br/>           NAGNCCNCTTAACTTGAAGNATCCACCCTTAAATTAACCTGAAAANTT<br/>           CNAGTNNCCCAACCTAAGTTT</p>     | <p>Not detectable-translocation too large</p> | <p>1088 bp, ends in exon 1</p> <p>TGTGGAGGTGTATGGGGTGTAGACCGGCAGAGACTCTCCCGGAGGAGC<br/>           CGGGTAGAGCGCACCCGCCCTTTACTTGGACTGCGCAGGGAGACCT<br/>           ACAGGGGAAAGAGCCGCTCCACACCACCCGCGGGTGGAAAGTCCGAAC<br/>           CGGAGGTGCTGGAGTGTGTGTGGGGGGGGGGGAAATCTGCCTTTTGG<br/>           CAGCAATTTGGGGGGGGGGTGTGTGGAAGAATGTGCCAGTCAACA<br/>           TAACGTACGACCAAGGCAAAATACGCAATGCTTCCCGCGAGATGGAG<br/>           TGGCTGTTTATCCCTAAGTGGCTCTCAAGTATACGTGGCAAGTGAATGCT<br/>           GAGCAATTTAATAAAATCCAGACATCTTTTCTGCTCATAGACCTCATCTG<br/>           CGTTGATCACCTCTATCACTCCACACACTGAGCCGGGCTCTAGATAA<br/>           CTCAATCTGCTGCTTCCCTTCTAAATCTGTTTCCCGAGCTTATA<br/>           GAGACCGCTTGGCCCGCCGGGACGTGGTGAAGGATGTGCCAGTCAAG<br/>           AAAGGAAAGGACTAGCGCCGAGCAAGAAATGTGCGGCCGACAG<br/>           TTAATCATGCTGGCTTACTTGTTTTACACCCCGGAGCCGAGTCTGGG<br/>           CTGCGGGGCTGAGGCTCTCATCTCTTCCCGGCTCCCACTAGCCCC<br/>           CTTCCCGAGTTTCCAAAGCAAAAGGGCGGGGAAGCAGAGGAGGAAAA<br/>           AGATNANAGAGGTTGGGNAAGGANAAGAAAGATCTCTGGGCTAATC<br/>           CCGCCCAACCCCTTTTATTTCCGGGGGCTGTCNCGGCCNAAAGACC<br/>           CTTGGGCTGCTGCTGCTCANCTGCGGGGCTCCNANTGCTCCTCAATCAA<br/>           NTTCCTCCCTGCTGCTGCTGAAAGGCAAGGGCTTCCCAACCCCTT<br/>           GCGGGGAAAAAAGGGAAGGGNAGGATCTCT</p> |
| <p>1105 bp- ends in exon 3' of J<sub>4</sub></p> <p>CCTCAGTACCCTGCTCCTCAGATAAGGAATGGCTCTCCAGGCTTTATTT<br/>           TAACCTTTGTTATGGAGTTTCTGAGCATTGCAGACTAATCTTGGATATTGT<br/>           CCTGAGGAGCCCGCTGAGAGAATTTGCAAAATAAAGTCTTAGGGATC<br/>           TCAAGCCCTTAGAGACTGATATCTCCACATCTTTGAAAACATAAGAACTC<br/>           TGTGATGTTTGGTGGAGTCCCTGGATGATGGATAGGACTTTGGAGG<br/>           CTCAITTTAGGGAGATGCTAAACAATCTCTAGGCTGCTGGAGGATGTTGGG<br/>           GCTGTAGTGGAGATTTTCAGTTTAAAGATAAAGTATAGCTGCGGAATAT<br/>           ACTTCAGGACCCTCTGTGACAGCATTATACAGTATCCGATGCATAGGG<br/>           ACAAGAGTGGAGTGGGCACTTTCTTAGATTGTGAGGAATGTCCACA<br/>           CTAGATTGTTTAAACCTCATTTTGGGAAGGAGAGCTGCTTAGTGAATGA<br/>           GTCAGGGGAGAAAGGATCTAGCCCTGGTCAAAGAGGATGTTGCTGCT<br/>           TAGAGAGTCTGGTGGAGCTCAAAGGATCCAGCTTTCAAAGGAACAGAG<br/>           AAGTATGTATGGAATATAGAAGATGTTGCTTTACTCTTAAAGTGGTCC<br/>           TAGAAAATAAGTTAAACTGTGACTTTTAAAGTGGAGGTTTCAAGT<br/>           ACTCATTTTTAAATGCTCAAATTTTGTCAATCAATTTGAGGCTGTTGTT<br/>           GTGTAGAACTGACATCTTAAAGTTTAAACCGGAAATGGAGTGGAGGCT<br/>           TCTCATCCCTATTAGAACTGACTTTTAAACAATAAATAAATTAAGTTTAA<br/>           AATAAATTTTAAATGAGCAATGTTGAGTGGAGTCAAGATGGCCGATCAG<br/>           CCAAGAACCTGTCAGCAGCTGGCAGGAAGCAGGTGATGTTGGCAAGGCTA<br/>           TTTGGGNNAGAAAATAAACNCTAGGTAACCTGTANCTGTGGTTGAA<br/>           AANTGGTTTGAACNCTGTGTCACCCCAACNAAAGTCCAGCTGAN<br/>           CAAAACNCCCTGGGANTTGCATTC</p>                                                                                                                                          | <p>Not detectable-translocation too large</p> | <p>920 bp, ends in exon 1</p> <p>TGTGGAGGTGTATGGGGTGTAGACCGGCAGAGACTCTCCCGGAGGAGC<br/>           CGGGTAGAGCGCACCCGCCCTTTACTTGGACTGCGCAGGGAGACCT<br/>           ACAGGGGAAAGAGCCGCTCCACACCACCCGCGGGTGGAAAGTCCGAAC<br/>           CGGAGGTGCTGGAGTGTGTGTGGGGGGGGGGGAAATCTGCCTTTTGG<br/>           CAGCAATTTGGGGGGGGGGTGTGTGGAAGAATGTGCCAGTCAACA<br/>           ACTGTACGACCAAGGCAAAATACCAATGCTTCCCGCGAGATGGAGT<br/>           GCTGTTTATCCCTAAGTGGCTCTCAAGTATACGTGGCAAGTGAATGCTGA<br/>           GCAATTTAATAAAATCCAGACATCTTTTCTGCTCATAGACCTCATCTGCG<br/>           GTTATCACCTCTATCACTCCACACACTGAGCCGGGCTCTAGATAACT<br/>           CATTGTTGCTGCTTCCCTTCTAAATCTGTTTCCCGAGCTTATAGCA<br/>           GACGCTGGCCCGCCGGGACGTGGTGAAGGATGTGCCAGTCAATGGCG<br/>           TATTGTGTGAGCGGAGCAGTGTCCACCTCGGTGACTGATATAGCAG<br/>           GGCAAGAACAGTTCAGCCGAGGCTGCGCCGAAACACCTGACAGAA<br/>           GGAAGAGGACTAGCGCCGAGCAAGAAATGTTGCCGGGCGGCTGATTA<br/>           ATTATGCTGCGCTTACTGTTTACACCCCGGAGCCGAGTCTGGGCTG<br/>           GGGGCTGANGCTTCTCTCTCTTCCCGGCTCCCACTAGCCCCCT<br/>           CCGAGTTTCCAAAGCAAAAGGGCGGGGAANAGGAGGAAAGAAAA<br/>           AAATNANANAGAGTGGGGAAGGANAANAANAATCTCTGGCNTA<br/>           ATCCCCGCCCAACCC</p>                                                                                      |

**Supplementary Figure 4: Sequences of cloned PCR products from IgH:MyC PCR amplification.** PCR was performed on genomic DNA from activated splenic B lymphocytes. PCR products cloned and sequenced from all genotypes contained sequences from both IgH and Myc. B lymphocyte genotypes were as follows: (A) p53<sup>-/-</sup>Mre11<sup>+/+</sup> (B) p53<sup>-/-</sup>Mre11<sup>-/H129N</sup> (C) p53<sup>-/-</sup>Mre11<sup>-/-</sup>. (B) and (C) are shown on the following pages.



# Supplementary Figure 4 (continued)

**B**

| IgH sequence                                                                                                                                                                                                                                                                                                                                                                                                                                                                                                                                                                                                                                                                                                                                                                                                                                                                                                                                                                                                                                                                                                                                                                                                                                                                                                                                                                                                                                                                                                                                                                                                                                                                                     | Junction                                               | Myc sequence                                                                                                                                                                                                                                                                                                                                                                                                                                                                                                                                                                                                                                                                                                                                                                                                                                                                                                                                                                                                                                                                                                                                                                                                                                                                                                                                                                                                                                                                                                           |
|--------------------------------------------------------------------------------------------------------------------------------------------------------------------------------------------------------------------------------------------------------------------------------------------------------------------------------------------------------------------------------------------------------------------------------------------------------------------------------------------------------------------------------------------------------------------------------------------------------------------------------------------------------------------------------------------------------------------------------------------------------------------------------------------------------------------------------------------------------------------------------------------------------------------------------------------------------------------------------------------------------------------------------------------------------------------------------------------------------------------------------------------------------------------------------------------------------------------------------------------------------------------------------------------------------------------------------------------------------------------------------------------------------------------------------------------------------------------------------------------------------------------------------------------------------------------------------------------------------------------------------------------------------------------------------------------------|--------------------------------------------------------|------------------------------------------------------------------------------------------------------------------------------------------------------------------------------------------------------------------------------------------------------------------------------------------------------------------------------------------------------------------------------------------------------------------------------------------------------------------------------------------------------------------------------------------------------------------------------------------------------------------------------------------------------------------------------------------------------------------------------------------------------------------------------------------------------------------------------------------------------------------------------------------------------------------------------------------------------------------------------------------------------------------------------------------------------------------------------------------------------------------------------------------------------------------------------------------------------------------------------------------------------------------------------------------------------------------------------------------------------------------------------------------------------------------------------------------------------------------------------------------------------------------------|
| <b>Mre11<sup>Δ/H129N</sup></b>                                                                                                                                                                                                                                                                                                                                                                                                                                                                                                                                                                                                                                                                                                                                                                                                                                                                                                                                                                                                                                                                                                                                                                                                                                                                                                                                                                                                                                                                                                                                                                                                                                                                   |                                                        |                                                                                                                                                                                                                                                                                                                                                                                                                                                                                                                                                                                                                                                                                                                                                                                                                                                                                                                                                                                                                                                                                                                                                                                                                                                                                                                                                                                                                                                                                                                        |
| <p style="text-align: center;">983 bp- ends in exon 3' of J<sub>H</sub>4</p> <p>CCTCAGGTAAGAATGGCCTCTCCAGGCTTTATTTTAAAC<br/>           CTTTGTATGGAGTTTCTGAGCATTGCAGACTAATCTTG<br/>           GATATTTGCCCTGAGGGAGCCGGCTGAGAGAAGTTGG<br/>           GAAATACAACGTCTAGGGATCTCAGAGCCTTTAGGACA<br/>           GATTATCTCCACATCTTGGAAAACTAAGAATCTGTGTGA<br/>           TGGTGTGGTGGAGTCCCTGGATGATGGGATAGGGACTT<br/>           TGGAGGCTCATTGGAGGAGATGCTAAAACAATCCTATG<br/>           GCTGGAGGGATAGTTGGGGCTGTAGTTGGAGATTTTCAG<br/>           TTTTGAATAAAAGTATTAGCTGCGGAATATACTTCAGGA<br/>           CCACCTCTGTGACAGCATTTATACAGTATCCGATGCATAG<br/>           GGACAAAGAGTGGAGTGGGGCCTTTCTTTAGATTTGTG<br/>           AGGAATGTTCCACACTAGATTGTTAACTTCATTGTTG<br/>           GAAGGAGAGCTGTCTAGTATTGATGCAAGGGAGAAAG<br/>           GCATCTAGCCTCGGTCTCAAAGGGTAGTTGCTGTCTAG<br/>           AGAGGCTGTTGGAGCCTGCAAAAGTCCAGCTTTCAA<br/>           GAAACACAGAAGTATGTGTAGGAATATTAGAAGATGTTG<br/>           CTTTACTGCTTAAAGTTGGTCTAGGAAAAATAGTAAAT<br/>           ACTGTGACTTTAAATGTGAGAGGGTTTTCAAGTACTCAT<br/>           TTTTTAAATGTCCAAAATTTTTGTCAATCAATTTGAGGTC<br/>           TTGTTTGTGAGAACTGACATTACTTAAAGTTAACCGAG<br/>           GAATGGGAGTGGAGCTCTCTACACCTATTCCAGAACTG<br/>           ACTTTTAAACAATAATAAATTAAGTTTAAATATTTTAAATGA<br/>           ATTGAGCAATGTTGAGTTGGAGTCAAGATGGCCGATCAG<br/>           AACCAGAACACCTGCAGCAGCTGGCAGGAAGCAGGTCA<br/>           TGTGGCAAGGCTATTTGGGGAAGGAAAAATAA</p>                                                                                                                                                                                                                   | <p>Not detectable-<br/>translocation too<br/>large</p> | <p style="text-align: center;">1015 bp, ends in exon 1</p> <p>TGTGGAGGTGTATGGGGTGTAGACCGGCAGAGACTCCTC<br/>           CCGGAGGAGCCGGGTAGAGCGCACCCGCCCACTTTA<br/>           CTGGACTGCGCAGGGAGACCTACAGGGGAAAGAGCCGC<br/>           CTCCACACCACCCGCCGGGTGGAAGTCCGAACCGGAGG<br/>           TGCTGGAGTGTGTGTGGGGGGGGGGGAATCTGCCT<br/>           TTTGGCAGCAAATTTGGGGGGGGGGTCTGTTCTGGAAG<br/>           AATGTGCCAGTCAACATAACTGTACGACCAAAGGCAAAA<br/>           TACACAATGCCTTCCCGCGAGATGGAGTGGCTGTTTATC<br/>           CCTAAGTGGCTCTCAAAGTATACGTGGCAGTGGATTGCT<br/>           GAGCAATTTAATAAAATTCAGACATCGTTTTTCTCGCAT<br/>           AGACCTCATCTGCGGTTGATCACCCTCTACTCCACAC<br/>           ACTGAGCGGGGGCTCCTAGATAACTATTGTTCTGCTCCTT<br/>           CCCCCTTTCTAAATCTGTTTTCCCGAGCCTTAGAGAGAG<br/>           GCCTGGCCGCCCGGACGTGCGTGACGCGGTCCAGGG<br/>           TACATGGCGTATTGTGTGGAGCGAGGCAGCTTTCCACC<br/>           TGCGGTGACTGATATACGACGGCAAGAACACCTTTCAG<br/>           CCGAGCGCTGCGCCGAACAACCGTACAGAAAGGGAAA<br/>           GGACTAGCGCGCAGCAAGAGAAAATGTCGGGCGCGC<br/>           AGTTAATTCATGCTGCGCTATTACTGTTTACACCCCGGAG<br/>           CCGGAGTACTGGGCTGCGGGGTGAGGCTCCTCCTCCT<br/>           CTTTCCCGGCTCCCCACTAGCCCCCTCCCGAGTTCCC<br/>           AAAGCANAGGGCGGGGNAAGCGAGAGGAGGAAAAA<br/>           AATAGAGAGAGGTGGGAAAGGANAAAAAATTTTC<br/>           TCTGGCTAAATCCCCCGCCCCANCCCGCCCCTTTTTA<br/>           TATTTCCCGGGGGNTCTGCCCGGGCCCAANGGACC<br/>           CCCCCTGGGGGTNGCCGCTTTGCTTCTCCANNCTTGCC<br/>           CGGGGG</p> |
| <p style="text-align: center;">1135 bp- ends in exon 3' of J<sub>H</sub>4</p> <p>CCTCAGTACCCTCTCCTCAGGTAAGAATGGCCTCTCCA<br/>           GGTCTTTATTTTAACTTTTGTATGGAGTTTCTGAGCAT<br/>           TGACAGACTAATCTTGGATATTTGTCCTGAGGGAGCCGG<br/>           CTGAGAGAAGTTGGGAAATAACTGTCTAGGGATCTCAG<br/>           AGCCTTTAGGACAGATTATCTCCACATCTTTGAAAACTA<br/>           AGAATCTGCGTGATGTTGTTGGTGGAGTCCCTGGATGAT<br/>           GGGATAGGGACTTTGGAGGCTCATTGAGGGAGATGCTA<br/>           AAACAATCCTATGGCCGGAGGGATAGTTGGGGCTGTAGT<br/>           TGGAGATTTTCAGTTTTAGAAATAAAGTGTAGCTGCGG<br/>           AATATACTCAGGACCCTCTGTGACAGCATTATACAG<br/>           TATCCGATGCATAGGGACAAAGAGTGGAGTGGGGCCTT<br/>           TCTTTAGATTTGTGAGGAATGTTCCACACTAGATTGTTAA<br/>           AACTTCATTTGTTGGAAGGAGAGCTGCTTAGTGATTGAG<br/>           TCAAGGGAGAAAGGCATCTAGCCTCGGTCTCAAAGGGT<br/>           AGTTGCTGTCTAGAGAGGCTGTTGGAGCCTGCAAAAG<br/>           TCCAGCTTTCAAAGGAACACAGAAGTATGTATGGAATA<br/>           TTAGAAGATGTTGCTTTACTCTTAAAGTTGGTTCTTAGGA<br/>           AGAATAGCTAAATACTGTGACTTTAAATGTGAGAGGGTT<br/>           TTCAAGTACTCATTTTTTAAATGTCCAAAATTTTTGTCAAT<br/>           CAATTTGAGGCTTTGTTGTGTAGAACTGACATTACTTAA<br/>           GTTTAACCGAGGAATGGGAGTGGGGCTCTCTACACCT<br/>           ATTCAGAACTGACTTTTAAACAATAATAAATTAAGTTTGAAT<br/>           ATTTTAAATGAATTGAGCAATGTTGAGTNGGAGTCAAGA<br/>           TGCCGATCAGAACAGAACACCTGCAGCAGCTGGCAG<br/>           GAAGCAGTCTGTGGCAAGGCTATTTGGGGAAGGGAA<br/>           AATAAACCNCTAGGTAACCTGTANCTGGGGTTTGAANAA<br/>           TGGTTTNNANCACTCTGTCCAGCCCCCAACCGAAAAGT<br/>           CNAGGCTGACNAANNCCCTGGGTAATGCATTCNAAA<br/>           ANAGTNGAGNATCNCCCAAACTGGA</p> | <p>Not detectable-<br/>translocation too<br/>large</p> | <p style="text-align: center;">974 bp, ends in exon 1</p> <p>TGTGGAGGTGTATGGGGTGTAGACCGGCAGAGACTCCTC<br/>           CCGGAGGAGCCGGGTAGAGCGCACCCGCCCACTTTA<br/>           CTGGACTGCGCAGGGAGACCTACAGGGGAAAGAGCCGC<br/>           CTCCACACCACCCGCCGGGTGGAAGTCCGAACCGGAGG<br/>           TGCTGGAGTGTGTGTGGGGGGGGGGGAATCTGCCT<br/>           TTTGGCAGCAAATTTGGGGGGGGGGTCTGTTCTGGAAG<br/>           AATGTGCCAGTCAACATAACTGTACGACCAAAGGCAAAA<br/>           TACGCAATGCTTCCCGCGAGATGGAGTGGCTGTTTAT<br/>           CCTAAGTGGCTCTCAAAGTATACGTGGCAGTGGATTGCT<br/>           TGAGCAATTTAATAAAATTCAGACATCGTTTTTCTGCA<br/>           TAGACCTCATCTGCGGTTGATCACCCTCTACTCCACA<br/>           CACTGAGCGGGGCTCCTAGATAACTATTGTTCTGCTCC<br/>           TTCCCCTTTCTAAATCTGTTTTCCCGAGCCTTAGAGAG<br/>           AGCCCTGGCCGCCCGGACGTGCGTGACGCGGTCCAG<br/>           GGTACATGGCGTATTGTGTGGAGCGAGGCAGCTGTTCCA<br/>           CCTGCGGTGACTGATATACGACGGGCAAGAACACAGTTC<br/>           AGCCGAGCGCTGCGCCGAACAACCGTACAGAAAAGGGA<br/>           AAGGACTAGCGCGCAGCAAGAGAAAATGGTCGGGCGC<br/>           GCAGTTAATTCATGCTGCGCTATTACTGTTTACACCCCG<br/>           AGCCGGAGTACTGGGCTGCGGGGTGANGCTCCTCATC<br/>           CTCTTTCCCGGCTCCCCACTAGCCCCCTCCCGAGTTTC<br/>           CCAAAGCAAANGGCGGGGAANCNANAGGAGGAAAAA<br/>           NATANANAGANGTNGGNAANGGAAAAAATAATNCT<br/>           CTGGCTAATCCCCGCCACCCGCCCTTTTATATTCCNNGG<br/>           GGTCTNCCCCGGCCAAAGACCCCTGGGGCTTGCNCT<br/>           GCTT</p>                                                       |

# Supplementary Figure 4 (continued)

C

| IgH sequence                                                                                                                                                                                                                                                                                                                                                                                                                                                                                                                                                                                                                                                                                                                                                                                                                                                                                                                                                                                                                                                                                                                                                                                                                                                                                                                                                                                                                                                                                                                                                                                                                                                                                                                                                                                                    | Junction                                                                                    | Myc sequence                                                                                                                                                                                                                                                                                                                                                                                                                                                                                                                                                                                                                                                                                                                                                                                                                                                                                                                                                                                                                                                                                                                                                                                                                                                                                                                                                                                                                                 |
|-----------------------------------------------------------------------------------------------------------------------------------------------------------------------------------------------------------------------------------------------------------------------------------------------------------------------------------------------------------------------------------------------------------------------------------------------------------------------------------------------------------------------------------------------------------------------------------------------------------------------------------------------------------------------------------------------------------------------------------------------------------------------------------------------------------------------------------------------------------------------------------------------------------------------------------------------------------------------------------------------------------------------------------------------------------------------------------------------------------------------------------------------------------------------------------------------------------------------------------------------------------------------------------------------------------------------------------------------------------------------------------------------------------------------------------------------------------------------------------------------------------------------------------------------------------------------------------------------------------------------------------------------------------------------------------------------------------------------------------------------------------------------------------------------------------------|---------------------------------------------------------------------------------------------|----------------------------------------------------------------------------------------------------------------------------------------------------------------------------------------------------------------------------------------------------------------------------------------------------------------------------------------------------------------------------------------------------------------------------------------------------------------------------------------------------------------------------------------------------------------------------------------------------------------------------------------------------------------------------------------------------------------------------------------------------------------------------------------------------------------------------------------------------------------------------------------------------------------------------------------------------------------------------------------------------------------------------------------------------------------------------------------------------------------------------------------------------------------------------------------------------------------------------------------------------------------------------------------------------------------------------------------------------------------------------------------------------------------------------------------------|
| Mre11 <sup>Δ</sup>                                                                                                                                                                                                                                                                                                                                                                                                                                                                                                                                                                                                                                                                                                                                                                                                                                                                                                                                                                                                                                                                                                                                                                                                                                                                                                                                                                                                                                                                                                                                                                                                                                                                                                                                                                                              |                                                                                             |                                                                                                                                                                                                                                                                                                                                                                                                                                                                                                                                                                                                                                                                                                                                                                                                                                                                                                                                                                                                                                                                                                                                                                                                                                                                                                                                                                                                                                              |
| <p>1151 bp- ends in exon 3' of J<sub>H</sub>4<br/>           CTTTGAAAAACTAAGAATCTGTGTGATGGTGTGGTGGAG<br/>           TCCTTGGATGATGGGATAGGGACTTTGGAGGCTCATTTG<br/>           AGGGAGATGCTAAACAATCCTATGGCTGGAGGGATAGTA<br/>           GGGGCCGTAGTTGGAGATTTTCAGTTTTAGAAATAAAAGT<br/>           ATTAGCTGCGGAATATACTTCAGGACCACCTCTGTGACAG<br/>           CATTATACAGTATCCGATGCATAGGGACAAGAGTGGAG<br/>           TGGGGCACTTTCTTTAGATTTGTGAGGAATGTTCCACACT<br/>           AGATTGTTTAAACTTCATTTGTTGGAAGGAGAGCTGTCT<br/>           TAGTGATTGAGTCAAGGGAGAAAGGCATCTAGCCTCGGT<br/>           CTCAAAGGGTAGTTGCTGTCTAGAGAGGCTGGTGGAG<br/>           CCTGCAAAAGTCCAGCTTTCAAAGGAACACAGAAGTATG<br/>           TGTATGGAATATTAGAAAGATGTTGCTTTTACTCTTAAAGTTG<br/>           GTTCTAGGAAAAATAGTAAATACTGTGACTTTAAATGT<br/>           GAGAGGGCTTTCAAGTACTCATTTTTTAAATGTCCAAAAT<br/>           TTTTGTCAATCAATTTGAGGCTTTGTTTGTAGAACTGAC<br/>           ATTACTTAAAGTTTAAACCGAGGAATGGGNAGTGAGGCTCT<br/>           CTCATACCTTATTCANAAGTACTTTTAAACAATAATAAAT<br/>           AAGTTTTAAATATTTTTAAATGAATTTGAGCAATGTTGAN<br/>           TTNGGANTCAANATGGCCCAATCANAACCAAAACACCT<br/>           GCANCACTGGCAAGAAACAAGGTCAATGTGGCNAAGG<br/>           CTTTTTGGGGGAAAGGNAAAAATAAAACCNC TAGGTAAA<br/>           ACTTNGTAACTTTNGTTTTGAAAAAATTTGTTTTNAA<br/>           AAANCTNTGTNCCANCCCCCCCCAAACCCGAAANGTTC<br/>           NNGNCTTNAANCAAACCCNCCTGGGGTTAATTTGCAN<br/>           TTTCCNAAAAAATTTGAAGAAATTCNNCCNAAAACTGGA<br/>           AANGGNCCCNCTTTTTANCTTTTTGANTTCANCTTTTT<br/>           ANTTTTNANCTNGAAAAATTTANNTTCCCNAACTTAA<br/>           ANTTTTTCCNCTTTTAAAGGNTTTTAAATNCTTTTTCAA<br/>           AATTTGGNTTTTTTAAAAAATNAAGGA</p>                                                                                                                  | <p>GGGGGG<br/>           GA/<br/>           CTTTGAAAA<br/>           A</p>                  | <p>185 bp, ends 5' of exon 1<br/>           TGTGGAGGTGTATGGGGTGTAGACCGGCAGAGACTCCTCC<br/>           CGGAGGAGCCGGGTANAGCGCACCCGCCCACTTTACTG<br/>           GACTGCGCAGGGAGACCTACAGGGGAAAGAGCCGCTCCA<br/>           CACCACCCCGGGTGGAAAGTCCGAACCGGAGGTGCTGG<br/>           AGTGTGTGTGGGGGGGGGGGA</p>                                                                                                                                                                                                                                                                                                                                                                                                                                                                                                                                                                                                                                                                                                                                                                                                                                                                                                                                                                                                                                                                                                                                             |
| <p>1222 bp- ends in exon 3' of J<sub>H</sub>4<br/>           CCTCAGTCACCGTTCCTCAGGATAAGGAATGGCCTCT<br/>           CCAGGTCTTTATTTTAACTTTTGTATGGAGTTTTCTGTG<br/>           CATTGCAGACTAATCTTGGATATTTGTCCCTGAGGGANCC<br/>           GGCTGAGAGAAGTTGGGAAATAAACTGTCTAGGGATCTC<br/>           AGAGCCTTTAGGACAGATTATCTCCACATCTTTGAAAAAC<br/>           TAAGAATCTGTGTGATGGTGTGGTGGAGTCCCTGGATG<br/>           ATGGGATAGGGACTTTGGAGGCTCATTGAGGGAGATGC<br/>           TAAACAATCCTATGGCTGGAGGGATAGTTGGGGCTGTAG<br/>           TTGGAGATTTTCAGTTTTTGAATAAAAAGTATTAGCTGCCG<br/>           AATATACTTCAAGACCACCTCTGTGACAGCATTATACAGT<br/>           ATCCGATGCATANGGACAAAGAGTGGAGTGGGGCACTTT<br/>           CTTTANATTTGTGAGGAATGTTCCACACTANATTTTAA<br/>           ACTTCAATTTGTTGGAAGGAGAGCTGTCTTAGTGATTGAGT<br/>           CAAGGGAGAAAGGCATCTAGCCTCGGTCTCAAAGGGTA<br/>           GTTGCTGTCTAGAGAGGCTGGTGGAGCCTGCAAAAGTC<br/>           CAGCTTTCAAAGGAACACAGAAGTATGTGTATGGAATATTA<br/>           GAAGATGTTGCTTTTACTCTTAAAGTTGGTTCCTAGGAAA<br/>           ATAGTTAAATACTGTGACTTTAAAAATGTGAGAGGGTTTTCA<br/>           AGTACTCATTTTTTAAATGTCCAAAATTTTTGTCAATCAAT<br/>           TTGAGGCTTTGTTGTGTAAGACTGACATTAAGTTTT<br/>           ANCCGAGGAATGGGAGTGGAGCTCTCTCATGCCCTATTC<br/>           AGAACTGACTTTTAAACAATAATAAATTAAGTTTTAAATATTTT<br/>           TAAATGAATTGAGCANTGTTGAGTTGGAGTCAAGATGGCC<br/>           GATCAGAACCAGAACACCTGCANCACTGGCAGGAAGC<br/>           AGGTCATGTGGCAAGGCTATTTGGGGAAAGGAAAATAA<br/>           ANCCACTAGGTAACCTGTAGCTGTGGTTTTGAAAAAGTGGT<br/>           TTGAAACCTCTGTCCAGCCCCCAACNAAAGTCCAG<br/>           GCCGAACAAAACNCCNCTGGGNNANTTGCATTNCTAAA<br/>           ANANNTGNAGAATCCCCNAACTNNGGANANGGCCCNNT<br/>           TTAACNTTGGAGTTCACCTTTAATTTNACCTTGA AAAAN<br/>           TCCANTTNC CCAAACTTANGTT</p> | <p>Not<br/>           detectable-<br/>           translocation<br/>           too large</p> | <p>996 bp, ends in exon 1<br/>           TGTGGAGGTGTATGGGGTGTAGACCGGCAGAGACTCCTCC<br/>           CGGAGGAGCCGGGTAGAGCGCACCCGCCCACTTTACTG<br/>           GACTGCGCAGGGAGACCTACAGGGGAAAGAGCCGCTCCA<br/>           CACCACCCCGGGTGGAAAGTCCGAACCGGAGGTGCTGG<br/>           AGTGTGTGTGGGGGGGGGGGAATCTGCCTTTTGGCAG<br/>           CAAATTTGGGGGGGGGGTCTGTTCTGAAAGAATGTGCCA<br/>           GTCAACATAACTGTACGACCAAGGCAAAATACACAATGCCT<br/>           TCCCCGCGAGATGGAGTGGCTGTTTATCCCTAAGTGGCTCT<br/>           CCAAGTATACGTGGCAGTGAATGCTGAGCAATTTAATAAA<br/>           ATTCCAGACATCGTTTTCTGTCATAGACCTCATCTGCCGTT<br/>           GATCACCTCTATCACTCCACACTGAGCGGGGGCTCCTA<br/>           GATAACTATTGTTCTGCTCCTCCCCCTTTCTAAATCTGTTT<br/>           TCCCCAGCCTTAGAGAGACGCTGGCCGCCGGGACGTGC<br/>           GTGACCGGGTCCAGGGTACATGGCGTATTGTGTGGAGCGA<br/>           GGCAGCTGTTCCACCTGCGGTGACTGATATACGAGGGCAA<br/>           GAACACAGTTCAGCCGAGCGCTGCGCCGAAACACCGTAC<br/>           AGAAAGGGAAGGACTAGCGCGGAGCAAGAGAAAATGGT<br/>           CGGGCGCGAGTTAATTCATGCTGCGCTATTACTGTTTACAC<br/>           CCGGAGCCGGAGTACTGGGCTGCGGGGGTGAAGCTCC<br/>           TCCTCCTTTTCCCGGCTCCCCACTAGCCCCCTCCGAG<br/>           TTCCCCAAGCAAAGGNNGGGGAAAGCGAGAGGAGGAAAA<br/>           AAAAATTANAGAGAGGTGGGGAAAGGGAANAAAAGATTCT<br/>           CTGGGCTAATCCCCGCCCAACCCGCTTTANNTTCCGG<br/>           GGGGTCTGCCCGNCCAAGGACCCNNTGGGNTGCNCTGC<br/>           TTCTCAACCTNCCCGGGTCCGA</p> |

## Supplementary Figure 5:

A

| Genotype               | Microhomology (A-NHEJ) | Blunt (C-NHEJ) |
|------------------------|------------------------|----------------|
| Mre11 <sup>+/-</sup>   | 14                     | 7              |
| Mre11 <sup>-/-</sup>   | 7                      | 5              |
| Mre11 <sup>H129N</sup> | 6                      | 9              |

B

|                                                             | DR-GFP                            | MMP-24                                              |
|-------------------------------------------------------------|-----------------------------------|-----------------------------------------------------|
| Mre11 <sup>+/-</sup>                                        | 5' GAGCTGTTACCCGGGTGGTGCCCAT      | <b>CCTGG</b> 3'                                     |
|                                                             |                                   | 3' <b>GGACC</b> GCAAAGACTCATTTCAAAACCTCTTCTCT 5'    |
|                                                             | 5' GGATCCACCCGGTCGCCACCATGGT      | <b>GAG</b> 3'                                       |
|                                                             |                                   | 3' <b>CTC</b> ATTTCAAAACCTCTTCTCTCT 5'              |
|                                                             | 5' ACGTAAACGGCCACAAGTTCAGCGTGTC   | 3' <b>CTTCCCGTCCGACC</b> GTCCTCTTCCGTCCAACG 5'      |
|                                                             | 5' AGGAGCTGTTACCCGGGTGGTGCCCAT    | 3' <b>GCAACCTGC</b> TTTCTCTGCCAGCCTGCCCTTC 5'       |
| Mre11 <sup>-/-</sup>                                        | 5' GGAGCTGTTACCCGGGTGGTGCCCA      | <b>CCA</b> 3'                                       |
|                                                             |                                   | 3' <b>GGTCTGACTGAAAGAGGACTGTGGTTG</b> 5'            |
|                                                             | 5' AGCTGGACGGCGACGTAAACGGCCACA    | <b>AGTT</b> 3'                                      |
|                                                             |                                   | 3' <b>TCAACGGGACGAATTAATTCGGGAGACCTCTCAGTCTG</b> 5' |
|                                                             | 5' AGGGCGAGGAGCTGTTACCCGGGTGG     | 3' <b>CGGGACGAATTAATTCGGGAGACCTCTCAGTCTGC</b> 5'    |
|                                                             | 5' GGGGTGGTGCCCATCCTGGTCGAGCTGGAC | 3' <b>TTAATGGACCGCAAAGACTCATTTCAAAACCTCTT</b> 5'    |
| Mre11 <sup>-/-</sup><br>+<br>Mre11 <sup>H129N</sup><br>cDNA | 5' CTGCTACCCGTGATCAGGCAGAGCAGG    | <b>AGG</b> 3'                                       |
|                                                             |                                   | 3' <b>TCCGGTCTGGGTCTGACTGAAAGAGGACTGTG</b> 5'       |
|                                                             | 5' AAGGGCGAGGAGCTGTTACCCGGGTGGT   | <b>GCCC</b> 3'                                      |
|                                                             |                                   | 3' <b>CGGGACGAATTAATTCGGGAGACCTCTCAGTCTGC</b> 5'    |
|                                                             | 5' CCCGGCACCGAGAAGCCCAGGAGCAGGAG  | 3' <b>GCAAAGACTCATTTCAAAACCTCTTCTCTTC</b> 5'        |
|                                                             | 5' CACAAGTTCAGCGTGCCGGCGAGGGC     | 3' <b>CTCAACGGGACGAATTAATTCGGGAGACCTCTCA</b> 5'     |

**Supplementary Figure 5: DR-GFP:MMP24 translocation junctions.** (A) Number of junctions with microhomologies (A-NHEJ) and blunt (C-NHEJ) recovered from MEFs of the indicated genotypes. (B) Representative sequences of A-NHEJ and C-NHEJ joins for each genotype. DR-GFP flanking sequences, left; MMP-24 flanking sequence, right (Bold); microhomologies, box.

## Supplementary Figure 6

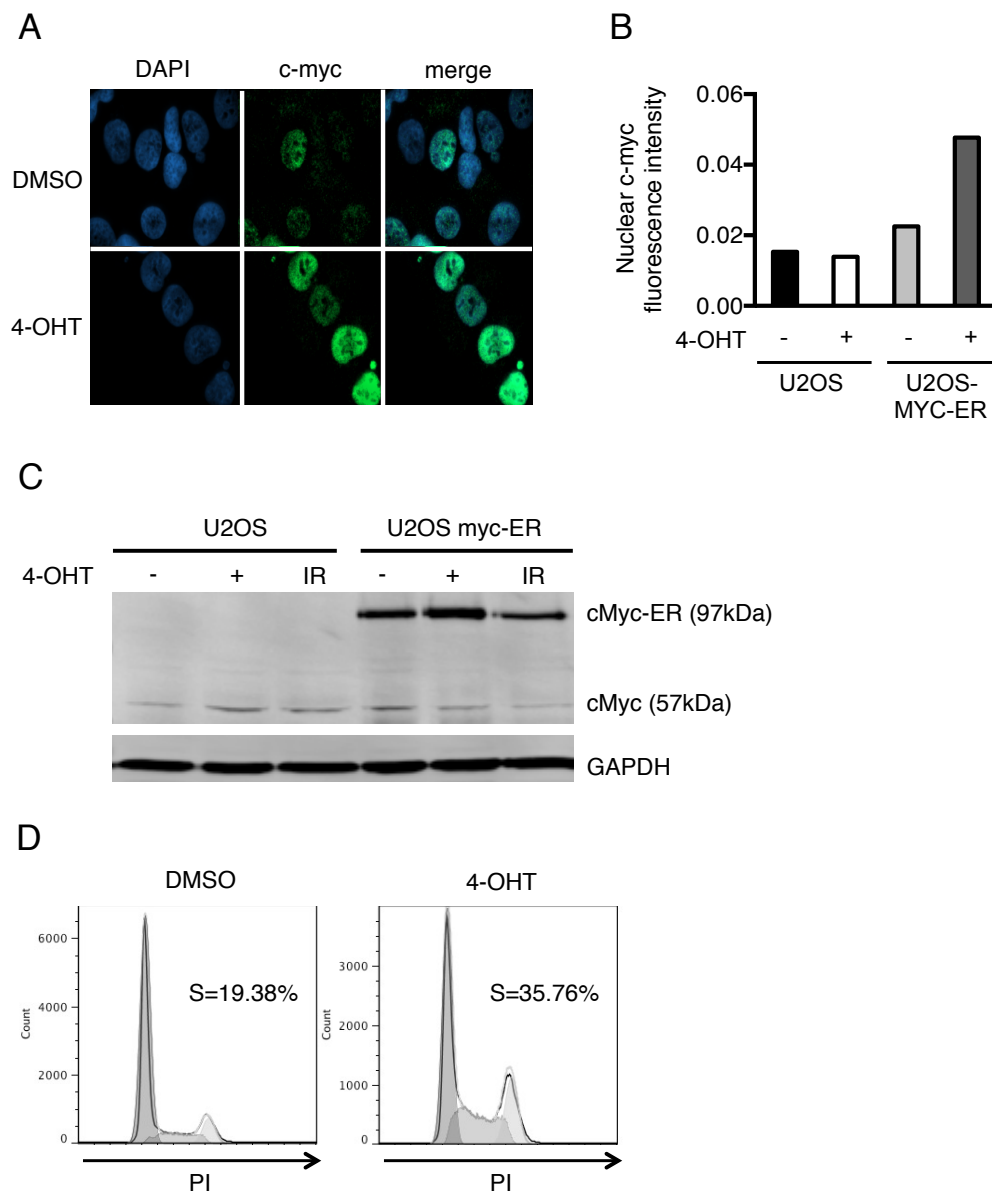

**Supplementary Figure 6: Inducible MYC overexpression.** U2OS and U2OS-MYC-ER cells were treated with DMSO or 200nM 4-OHT for 72 hours to induce MYC localization to the nucleus. (A) Immunofluorescent images of nuclear MYC. (B) Fluorescence intensity of nuclear MYC was quantitated using Applied Spectral Imaging software. (C) Western blot analysis of MYC-ER. Cell lysates from untreated and 4-OHT treated cells were analyzed by western blotting using an  $\alpha$ -MYC antibody. The MYC-ER fusion protein (97kDa) is overexpressed compared to the endogenous MYC protein (57kDa). GAPDH, loading control. (D) Flow cytometry analysis. DNA content was analyzed by fixing cells and staining with propidium iodide. Percent indicates cells in S-phase of the cell cycle.

## Supplementary Figure 7

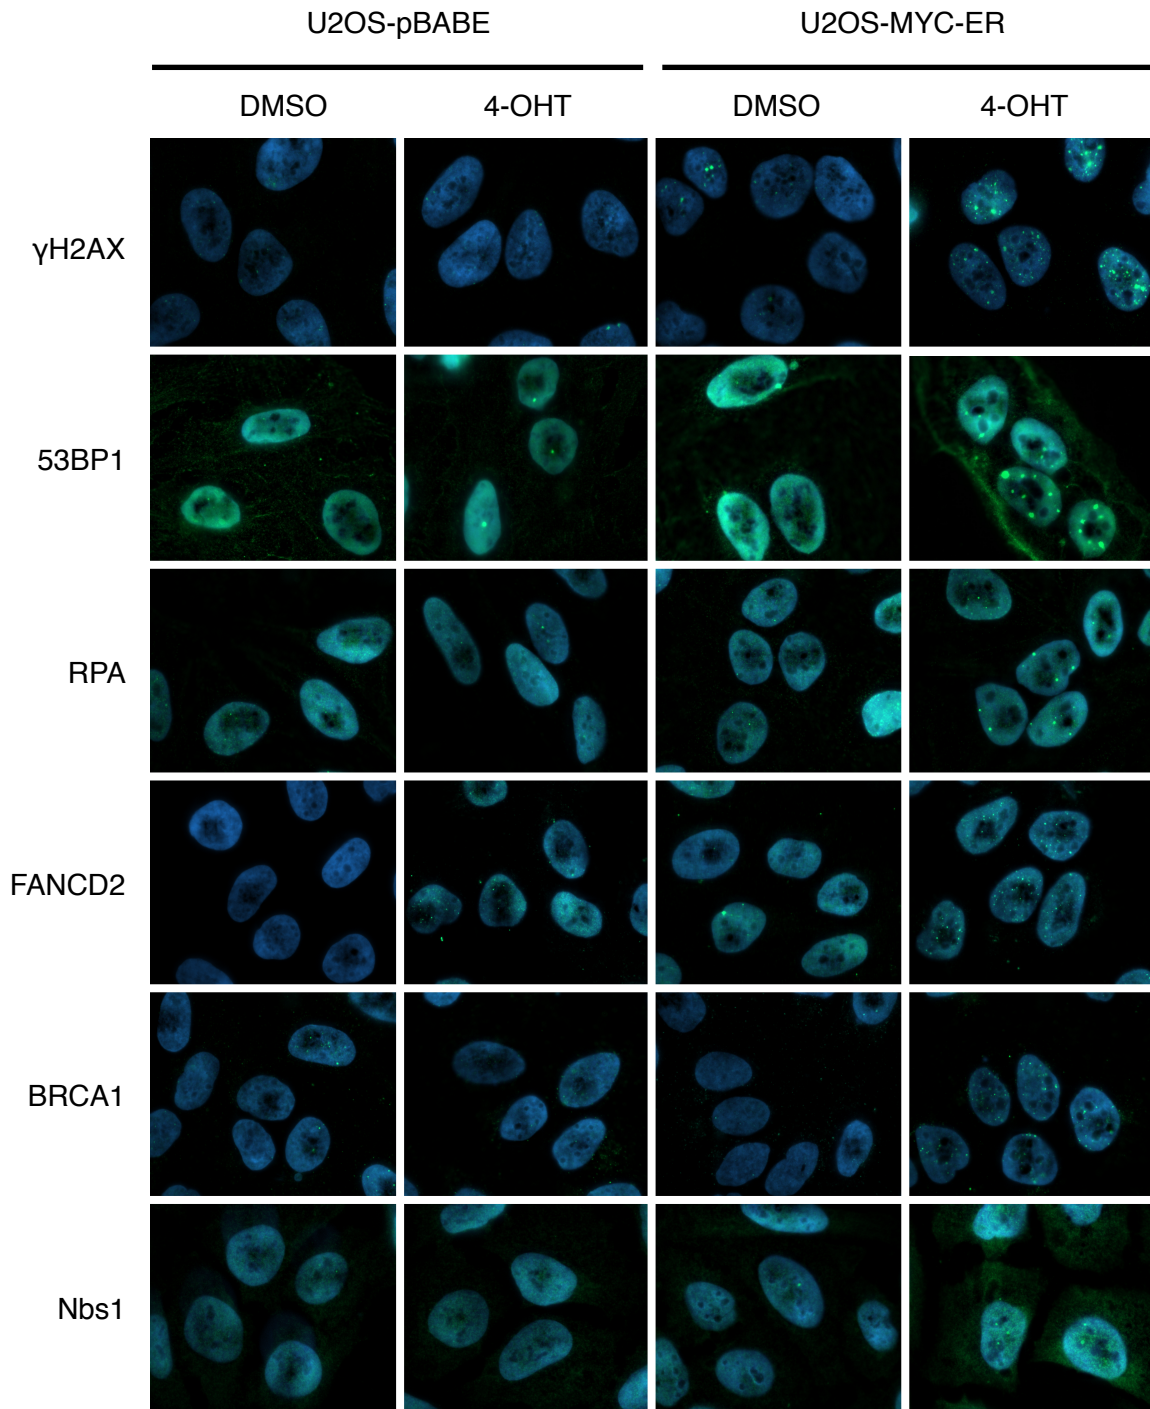

**Supplementary Figure 7: DNA repair foci induced by MYC overexpression.** U2OS cells harboring pBABE (empty vector) or pBABE-MYC-ER were treated with DMSO or 200nM 4-OHT to induce MYC localization to the nucleus. DNA repair proteins (indicated at left) were detected by immunofluorescence microscopy (green); DAPI, blue. Representative images of nuclear foci from Figure 4C-H are shown.

## Supplementary Figure 8

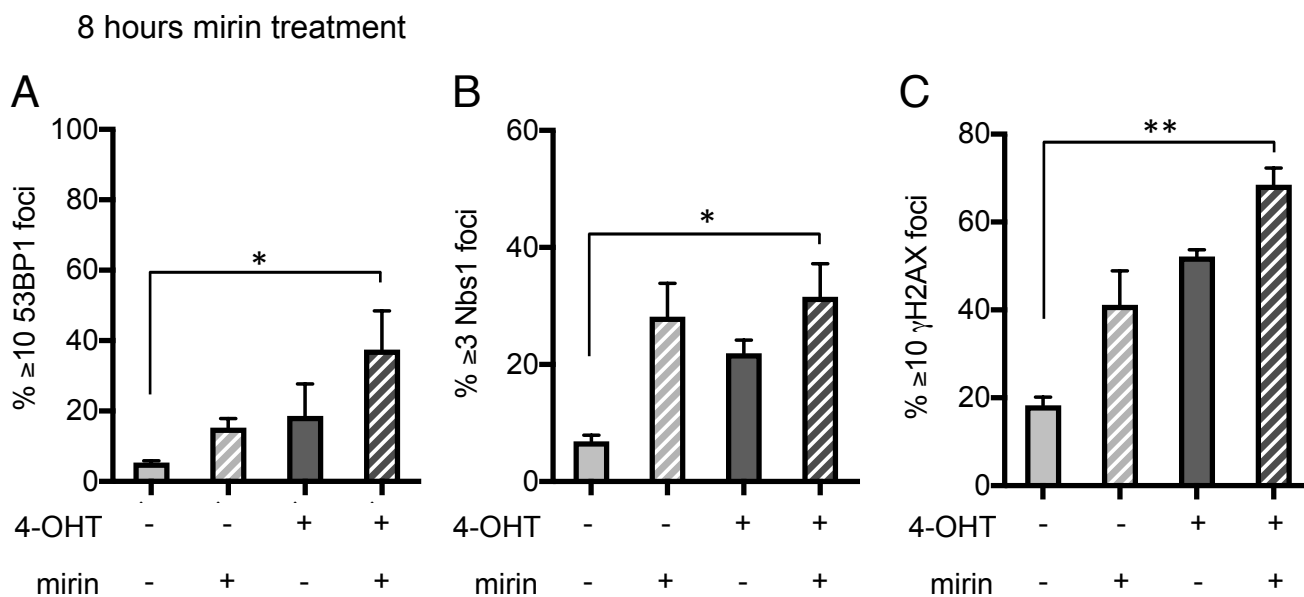

### Supplementary Figure 8: Quantitation of DNA repair foci in mirin treated cells

**overexpressing MYC.** U2OS-cMycER cells were treated with DMSO or 75 $\mu$ M mirin for 8 hours after 72 hours 200nM 4-OHT treatment, and localization of DNA repair foci was examined by immunofluorescence microscopy. Percentages of nuclei with indicated DNA repair foci are plotted. Mean  $\pm$  SEM of 3 independent experiments. \*,  $p < 0.05$ ; \*\*,  $p < 0.01$ ; paired t-test.
